# 1 Projecting the second outbreaks for global COVID-19 pandemic

2  
3 Jianping Huang<sup>1,\*</sup>, Xiaoyue Liu<sup>1</sup>, Li Zhang<sup>1</sup>, Kehu Yang<sup>2</sup>, Yaolong Chen<sup>2</sup>,

4 Zhongwei Huang<sup>1</sup>, Chuwei Liu<sup>1</sup>, Xinbo Lian<sup>1</sup>, Danfeng Wang<sup>1</sup>

5  
6 <sup>1</sup>Collaborative Innovation Center for Western Ecological Safety,

7 Lanzhou University, Lanzhou, 730000, China.

8 <sup>2</sup>Evidence-based Medicine Center, Lanzhou University, Lanzhou, 730000, China

9  
10 \* Correspondence author: Jianping Huang ([hjp@lzu.edu.cn](mailto:hjp@lzu.edu.cn))

## 11 12 13 Abstract

14 COVID-19 is now in an epidemic phase, with a second outbreak likely to appear  
15 at any time. The intensity and timing of a second outbreak is a common concern  
16 worldwide. In this study, we made scenario projections of the potential second outbreak  
17 of COVID-19 using a statistical-epidemiology model, which considers both the impact  
18 of seasonal changes in meteorological elements and human social behaviors such as  
19 protests and city unblocking. Recent street protests in the United States and other  
20 countries are identified as a hidden trigger and amplifier of the second outbreak. The  
21 scale and intensity of subsequent COVID-19 outbreaks in the U.S. cities where the  
22 epidemic is under initial control are projected to be much greater than those of the first  
23 outbreak. For countries without reported protests, lifting the COVID-19 related  
24 restrictions prematurely would accelerate the spread of the disease and place mounting  
25 pressure on the local medical system that is already overloaded. We anticipate these  
26 projections will support public health planning and policymaking by governments and  
27 international organizations.

## 28 **1 Introduction**

29       Recently, the COVID-19 pandemic has spread rapidly and poses a dire threat to global  
30 public health, which claimed over 0.49 million lives, along with 9.8 million confirmed cases  
31 as of June 28<sup>th</sup><sup>1</sup>. Beyond the spread itself, the outbreak may have far-reaching consequences,  
32 negatively affecting the economic development worldwide and posing a series of long-standing  
33 social problems<sup>2,3</sup>. There is an urgent need for a global prediction system that can provide  
34 scientific guidelines for the World Health Organization and international decision-makers to  
35 implement effective containment measures capable of curbing the spread of COVID-19<sup>4</sup>.  
36 Researchers worldwide have developed various models with mathematical and statistical  
37 methods, including stochastic simulations, lognormal distribution<sup>5</sup>, machine learning, and  
38 artificial intelligence<sup>6</sup>. Among them, the susceptible-infectious-removed infectious disease  
39 model (SIR) is the most widely used<sup>7-9</sup>. However, this simple model is built under a series of  
40 idealized assumptions, which may limit the accuracy and reliability of the prediction. In order  
41 to obtain the prediction results with higher credibility, more complex models with fewer  
42 assumptions should be developed so as to simulate the actual situations in a more realistic  
43 manner<sup>10</sup>.

44       Although it is difficult to establish an accurate epidemiological model describing the  
45 spread of a pandemic, the reported global pandemic data contain particular solutions to the  
46 mathematical equations incorporated in epidemiological models<sup>3,6</sup>. It is theoretically possible  
47 to remedy the defects of prior epidemiological models by introducing the latest pandemic data  
48 and hence improve the pandemic prediction<sup>2,4,6</sup>. Based on this idea, we have developed a  
49 Global Prediction System of the COVID-19 Pandemic (GPCP)<sup>11</sup>. The system develops a  
50 modified version of the SIR model and determines the parameters through historical data  
51 fitting<sup>12,13</sup>, which allows it to make targeted predictions for various countries and obtain better  
52 prediction results. The first version of GPCP (CPCP-1) can capture the major features of the  
53 daily number of confirmed new cases and provides reliable predictions. However, the  
54 prediction of GPCP-1 is only valid for one month<sup>11</sup>.

55 In this study, the second version of the Global Prediction System for COVID-19 Pandemic  
56 (GPCP-2) is developed based on a modified SEIR model<sup>14</sup>. The system considers both the  
57 seasonal changes of meteorological elements and human social behaviors including protests  
58 and city unblocking. The paper is arranged as follows: the details of the datasets and the  
59 methodology used are given in section 2. In section 3, projections of 12 cities in the United  
60 States are presented. The projections of 15 countries with reported protests and 15 countries  
61 without reported protests are shown in section 4 and section 5, respectively. Discussion and  
62 conclusion are presented in section 6.

## 63 **2 Method**

### 64 2.1 The modified SEIR model

65 The second version of Global Prediction System for COVID-19 Pandemic (GPCP) is built  
66 based on a modified SEIR model<sup>15</sup>. The traditional SEIR model<sup>10,14</sup> defines seven states of the  
67 disease: susceptible cases (S), insusceptible cases (P), potentially infected cases (E, infected  
68 cases in a latent period), infectious cases (I, infected cases that have not been quarantined),  
69 quarantined cases (Q, confirmed and quarantined cases), recovered cases (R), and cases of  
70 mortality (D). The SEIR model is able to emulate the time curve of an outbreak. The model is  
71 consisted of the following equations:

$$72 \quad \frac{dS(t)}{dt} = -\beta(t)I(t)S(t)/N - \alpha S(t), \quad (1)$$

$$73 \quad \frac{dP(t)}{dt} = \alpha S(t), \quad (2)$$

$$74 \quad \frac{dE(t)}{dt} = \beta(t)I(t)S(t)/N - \gamma(t)E(t), \quad (3)$$

$$75 \quad \frac{dI(t)}{dt} = \gamma(t)E(t) - \delta(t)I(t), \quad (4)$$

$$76 \quad \frac{dQ(t)}{dt} = \delta(t)I(t) - \lambda(t)Q(t) - \kappa(t)Q(t) \quad (5)$$

$$77 \quad \frac{dR(t)}{dt} = \lambda(t)Q(t) \quad (6)$$

$$78 \quad \frac{dD(t)}{dt} = \kappa(t)Q(t) \quad (7)$$

79 The sum of the six categories is equal to the total population (N) at any time.

$$80 \quad S + P + E + I + Q + R + D = N$$

81 We modified the model by introducing the timing of community reopening collected from

82 news reports. If the timing collected from news reports is not explicit enough as an input to our  
83 model, the timing will be indicated by the daily new cases on the day of reopening ( $dQ_c$ ). As  
84 the number of newly confirmed cases on a given day falls lower than  $dQ_c$ , local authority begins  
85 to lift or loose the lockdowns.

86 In addition, the temporal variation of transmission rate due to changes in local temperature  
87 as well as human behaviors are considered. Generally, the transmission rate ( $\beta(t)$ ) can be  
88 expressed by the following equations:

$$89 \quad \beta(t) = \begin{cases} \beta_0 & t < t_{int} \\ \beta_1 & t_{int} \leq t < t_{lift} \\ \beta_2 + E \times F(t) & t \geq t_{lift} \end{cases}$$

90 where  $\beta_0$  represents the transmission rate in the non-intervention period at the early stage of  
91 the pandemic ( $t < t_{int}$ );  $\beta_1$  represents the transmission rate during the intervention period  
92 ( $t_{int} \leq t < t_{lift}$ );  $\beta_2$  represents the transmission rate after the restriction is lifted.  $\beta_0$  and  $\beta_1$   
93 are fitted against the actual reported data, while  $\beta_2$  is the assumed value in possible future  
94 scenarios. We assume a 14-day delay in the effect of the intervention on the infection rate.  $F(t)$   
95 is the PDF function obtained by Huang et al.<sup>16</sup>, who found that 60.0% of confirmed COVID-  
96 19 cases occurred in places where the air temperature ranged from 5°C to 15°C. Using the  
97 NCEP reanalysis data, we calculated the global distribution of probability distribution function  
98 (PDF) values on each day of the year and included its influence on the infection rate. Figure 1  
99 shows the PDF values for the four seasons in a year. High PDF values correspond to the ambient  
100 temperature that is conducive for the virus to spread. For the northern hemisphere, the optimal  
101 band generally moves northward in summer (June, July, and August) and moves southward in  
102 winter (December, January, and February), while for southern hemisphere the optimal band  
103 moves southward in summer (December, January, and February) and moves northward in  
104 winter (June, July, and August).

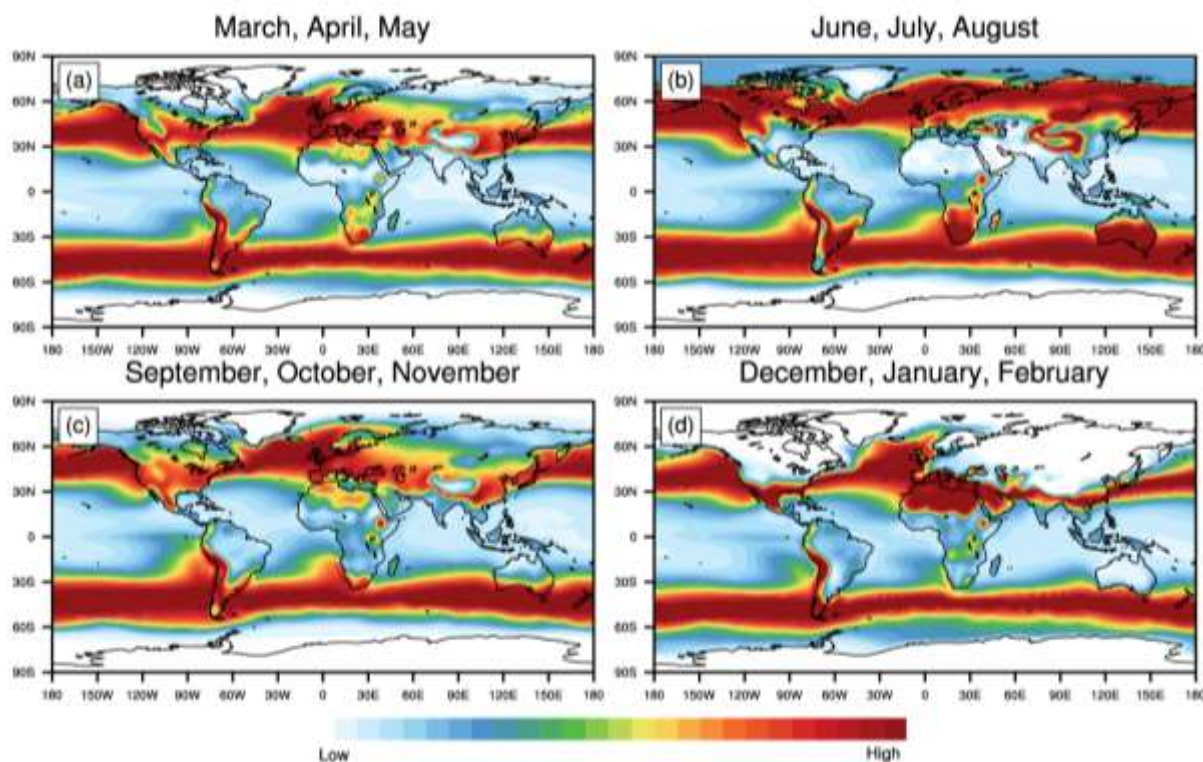

105

106 **Figure 1: The optimal temperature zone for the spread COVID-19.** Regions with warm  
107 shadings indicate more conducive temperature for the spread of the virus and vice versa.

108 Since the seasonality of transmission is still disputed and future trajectory of the outbreaks  
109 may be influenced by the intensity of intervention measures, four future scenarios are designed  
110 to project the epidemic after easing COVID-19 related restrictions:

111 - **Scenario 1:** The restrictions are completely lifted after  $t_{int}$  ( $\beta_2 = \beta_0$ ). The seasonal forcing  
112 on the transmission rate is considered ( $E = 1$ ).

113 - **Scenario 2:** The restrictions are partially lifted after  $t_{int}$  ( $\beta_2 = (\beta_0 + \beta_1)/2$ ). The seasonal  
114 forcing on the transmission rate is considered ( $E = 1$ ).

115 - **Scenario 3:** The restrictions are completely lifted after  $t_{int}$  ( $\beta_2 = \beta_0$ ). The seasonal forcing  
116 on the transmission rate is not considered ( $E = 0$ ).

117 - **Scenario 4:** The restrictions are partially lifted after  $t_{int}$  ( $\beta_2 = (\beta_0 + \beta_1)/2$ ). The seasonal  
118 forcing on the transmission rate is not considered ( $E = 0$ ).

## 119 2.2 Parameter fitting and numerical solutions

120 In order to enhance the stability of the traditional least square method (Gauss-Newton  
121 algorithm), we use an improved damped least square method called Levenberg-Marquardt

122 algorithm<sup>17</sup>. This method inserts a damping coefficient into the Gauss-Newton method when  
123 calculating the Hessian matrix. The benefit of introducing this damping coefficient is that it  
124 can converge very quickly in the steepest direction in many cases even when the initial solution  
125 is very far from ideal values, which makes the parameter determination more robust<sup>18</sup>. In  
126 addition, for all damping coefficient greater than 0, the coefficient matrix is positive definite  
127 which makes the Hessian matrix in the descending direction. The input variables to obtain fitted  
128 parameters ( $\alpha, \beta, \gamma, \delta, \lambda$ , and  $\kappa$ ) are the time series of confirmed ( $Q(t) - D(t) - R(t)$ ), death  
129 ( $D(t)$ ), and recovered ( $R(t)$ ) cases provided by from Johns Hopkins University Center for  
130 Systems Science and Engineering<sup>1</sup>. The equations are solved using the classic 4th order Runge-  
131 Kutta method.

### 132 **3 Projections of the US cities**

133 Unfortunately, the recent protests against police violence in cities across the United States  
134 have gone ahead despite the current rising COVID-19 pandemic and potential subsequent  
135 outbreaks, possibly with higher intensity. Large public gatherings, shouting, and marching  
136 shoulder to shoulder may have already sown the seeds of the second outbreaks in regions under  
137 initial control<sup>19,20</sup> and made it even more difficult to contain the epidemic in regions where the  
138 curve is still increasing. The use of tear gas and pepper spray against the protesters may also  
139 have produced violent coughing and runny noses, forcing protesters to remove their masks and  
140 making the crowds even more susceptible to the virus. A certain number of patients with the  
141 latent disease may have participated in the protests and spread the disease to healthy protesters,  
142 police officers, and national guards who are not yet immune to the virus<sup>21</sup>. If the close contacts  
143 of the infectious are not fully tracked, they may spread the virus to other groups of people,  
144 increasing the risk of a larger size of outbreaks. Here, we simulated the impact of large-scale  
145 protests on the potential second outbreaks in several cities of the United States<sup>22</sup> (Figure 2 and  
146 Table 1). The model generally predicted a second wave of COVID-19 in the second half of  
147 2020. We estimated the increase in the population of potentially infected people ( $\delta E_i$ ) for each  
148 city based on the ratio of the number of infected persons ( $Q_i$ ) to the total population of the city

149 (N). The timing of protests and the number of protesters in each city were collected from local  
 150 news reports (Table 1). The increase in the population of potentially infected people ( $\delta E_t$ ) and  
 151 the populations of protesters ( $\delta S_t$ , regarded as an increase in the population of susceptible) were  
 152 used as the force input for the model calculations to simulate the impact of protests on the  
 153 outbreaks. When the protests begin, we force group E and group S to increase  $\delta E_t$  and  $\delta S_t$ ,  
 154 respectively.

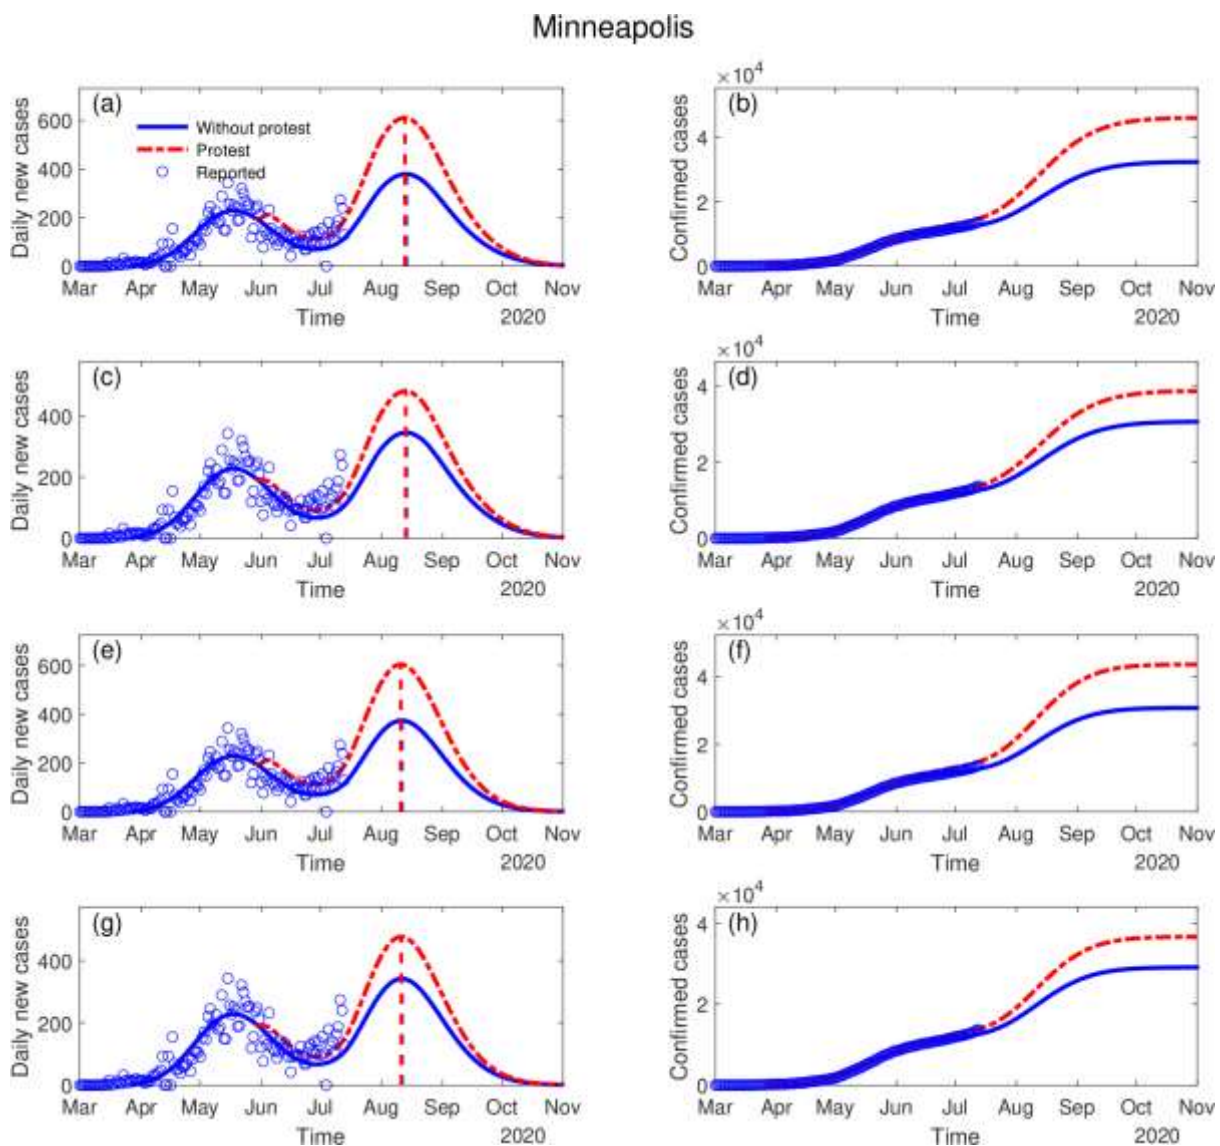

155  
 156 **Figure 2: The impact of protests on the possible second outbreak in Minneapolis.** The blue  
 157 dots denote the reported daily incidence of COVID-19 cases. The blue line represents the  
 158 simulation and projections without protests, while the dashed red line denotes the simulation  
 159 and projections with protests. Four scenarios with protests and four scenarios without protests  
 160 are simulated. (a)~ (b), (c)~(d), (e)~(f), (g)~(h) are the simulation for Scenario 1, 2, 3, 4,

161 respectively. (a)~(b) and (c)~(d) are the simulations with seasonal forcing; (e)~(f) and (g)~(h)  
162 are the simulations without seasonal forcing. (a)~(b) and (e)~(f) are the simulations where the  
163 restrictions are completely lifted; (c)~(d) and (g)~(h) are the simulations where the restrictions  
164 are partially lifted.

165 Figure 2 shows the projections for Minneapolis in 8 scenarios (4 scenarios with protests  
166 and 4 without). After the COVID-19 restrictions were lifted, an upward trend of daily new  
167 cases has been observed. The protests would significantly amplify the intensity of the second  
168 outbreak but may not be able to advance it. In scenarios 1, the second outbreak of Minneapolis  
169 will peak in mid-August 2020. The comparison between scenarios indicates that the effect of  
170 intervention measures outweighs the seasonal forcing. For the rest of the 12 cities, the model  
171 also predicted enhanced second outbreaks when the impact of protests is considered (Table 1).  
172 Due to space constraints, the details of the projection results are not presented in the manuscript  
173 and can be accessed at <http://covid-19.lzu.edu.cn/>.

174



175 **Table 1 Projections of the second outbreaks in some US cities in Scenario 1**

| Countries                      | Population<br>(million) | Start date of<br>Protests | Estimated<br>participants | The peak time<br>of the second<br>outbreaks | Peak time daily new<br>incidence without protests | Peak time daily new<br>incidence with protests | End of the second<br>outbreak | Accumulated<br>Confirmed Cases |
|--------------------------------|-------------------------|---------------------------|---------------------------|---------------------------------------------|---------------------------------------------------|------------------------------------------------|-------------------------------|--------------------------------|
| New York City (New York)       | 8.33                    | May, 29 <sup>th</sup>     | 25,000                    | Mid-August                                  | Around 8,000                                      | Around 18,000                                  | End of 2020                   | Around 900,000                 |
| Chicago (Illinois)             | 5.15                    | May, 28 <sup>th</sup>     | 30,000                    | Mid-September                               | Around 2700                                       | Around 4100                                    | End of 2020                   | Around 390,000                 |
| Minneapolis (Minnesota)        | 1.26                    | May, 26 <sup>th</sup>     | 30,000                    | Mid-September                               | Around 400                                        | Around 700                                     | End of 2020                   | Around 48,000                  |
| Columbus (Ohio)                | 1.31                    | May, 28 <sup>th</sup>     | 10,000                    | Late-September                              | Around 120                                        | Around 380                                     | End of 2020                   | Around 35,000                  |
| Westchester (Illinois)         | 0.97                    | May, 29 <sup>th</sup>     | 30,000                    | Mid-August                                  | Around 3,500                                      | Around 5,500                                   | September, 2020               | Around 150,000                 |
| Philadelphia<br>(Pennsylvania) | 10.04                   | May, 30 <sup>th</sup>     | 10,000                    | Mid-October                                 | Around 800                                        | Around 1,700                                   | End of 2020                   | Around 120,000                 |
| Seattle (Washington)           | 2.25                    | May, 29 <sup>th</sup>     | 50,000                    | Late-August                                 | Around 2,00                                       | Around 600                                     | End of 2020                   | Around 35,000                  |
| Washington, D.C.               | 0.70                    | May, 29 <sup>th</sup>     | 10,000                    | Mid-October                                 | Around 180                                        | Around 650                                     | September, 2020               | Around 70,000                  |
| San Francisco (California)     | 0.88                    | May, 30 <sup>th</sup>     | 30,000                    | Mid-August                                  | Around 100                                        | Around 400                                     | October, 2020                 | Around 22,000                  |
| Detroit (Michigan)             | 1.75                    | May, 29 <sup>th</sup>     | 30,000                    | Early-September                             | Around 1,000                                      | Around 2,200                                   | October, 2020                 | Around 70,000                  |
| Miami-Dade (Florida)           | 2.72                    | May, 30 <sup>th</sup>     | 20,000                    | Mid-August                                  | Around 1,800                                      | Around 3,000                                   | September, 2020               | Around 120,000                 |
| San Diego (California)         | 3.34                    | May, 29 <sup>th</sup>     | 30,000                    | Late-August                                 | Around 1,000                                      | Around 1,600                                   | September, 2020               | Around 130,000                 |

177 **4 Projections of countries with reported protests**

**United Kingdom**

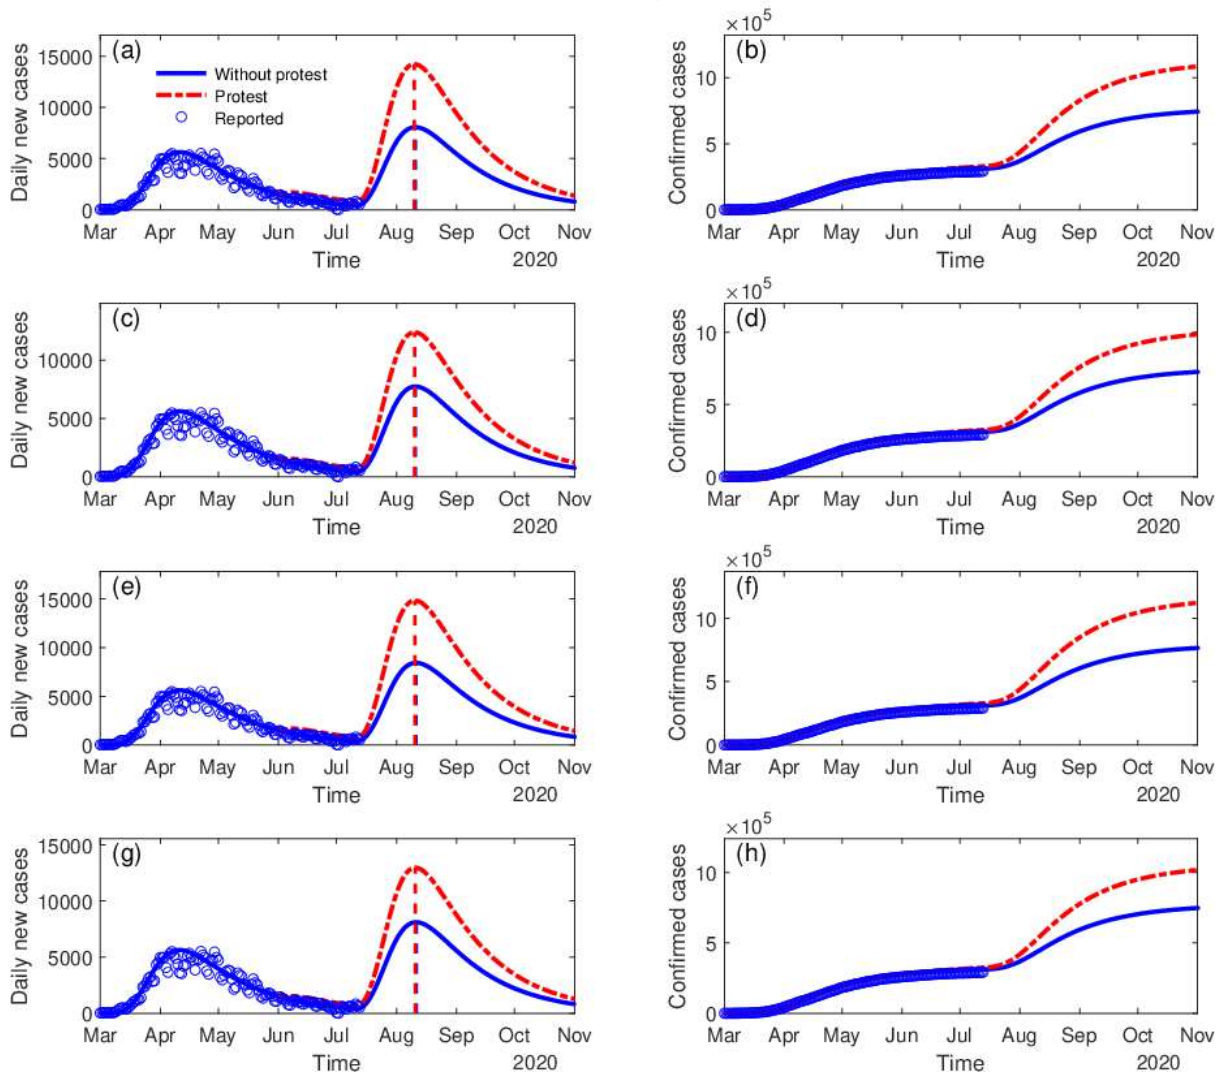

178  
 179 **Figure 3: The impact of protests on the possible second outbreak in the United Kingdom.**  
 180 The blue dots denote the reported daily incidence of COVID-19 cases. The blue line represents  
 181 the simulation and projections without protests, while the dashed red line denotes the  
 182 simulation and projections with protests. The scenarios in these subplots are the same as Figure  
 183 2.

184 In addition to the United States, protests of a certain scale also broke out in other countries.  
 185 Using similar parameterization of the protests, Table 3 presents the projections of the second  
 186 outbreaks in the United Kingdom, the United States, Germany, Italy, Australia, Canada, Spain,  
 187 Mexico, Switzerland, Belgium, Netherlands, Ireland, and Denmark. For the United Kingdom  
 188 (Figure 3), the second outbreak is likely to peak during August. Under the impact of protests,

189 when the restrictions are lifted completely, a second wave with a peak of 14,160 is expected,  
190 which is 75.6% higher than the scenario without protests (Scenario 1). The protests and the  
191 lifting of restrictions, along with the enhancement in the ability of virus transmission in the  
192 cold seasons due to temperature change may cause the recurrence of an outbreak that was  
193 initially under control. If the same intervention measures are implemented during the second  
194 outbreak, the second outbreak would be brought under control again by the end of 2020.

**Table 2 Projections of the second outbreaks in some countries (with protests)**

| Countries      | Population (million) | Start date of Protests | Estimated participants | The peak time of the second outbreaks | Peak time daily new incidence without protests | Peak time daily new incidence with protests | End of the second outbreak | Accumulated Confirmed Cases with protests |
|----------------|----------------------|------------------------|------------------------|---------------------------------------|------------------------------------------------|---------------------------------------------|----------------------------|-------------------------------------------|
| United Kingdom | 66.48                | May, 28 <sup>th</sup>  | 70,000                 | Early-August                          | Around 8,000                                   | Around 14,170                               | End of 2020                | Around 1,150,000                          |
| United States  | 328.2                | May, 26 <sup>th</sup>  | 1,500,000              | Late-July                             | Around 40,000                                  | Around 120,000                              | End of 2020                | Around 16,000,000                         |
| Germany        | 82.93                | May 30 <sup>th</sup>   | 160,000                | Early-September                       | Around 4,500                                   | Around 7,000                                | End of 2020                | Around 450,000                            |
| Italy          | 60.43                | June, 30 <sup>th</sup> | 150,000                | Early-October                         | Around 6,000                                   | Around 95,000                               | End of 2020                | Around 600,000                            |
| Australia      | 25.44                | June, 2 <sup>nd</sup>  | 14,000                 | Early-August                          | Around 500                                     | Around 1,900                                | End of 2020                | Around 45,000                             |
| Canada         | 37.05                | May, 30 <sup>th</sup>  | 100,000                | Late-September                        | Around 1,800                                   | Around 2,500                                | End of 2020                | Around 250,000                            |
| Spain          | 46.73                | June, 1 <sup>st</sup>  | 10,000                 | Early-September                       | Around 7,600                                   | Around 9,400                                | End of 2020                | Around 1,100,000                          |
| Mexico         | 126.2                | May, 30 <sup>th</sup>  | 50,000                 | Late-August                           | Around 5,800                                   | Around 7,600                                | End of 2021                | Around 1,500,000                          |
| Switzerland    | 8.57                 | May, 31 <sup>st</sup>  | 20,000                 | Early-August                          | Around 1,400                                   | Around 2,100                                | October, 2020              | Around 80,000                             |
| Belgium        | 11.42                | June, 1 <sup>st</sup>  | 50,000                 | Late-August                           | Around 2,000                                   | Around 4,200                                | End of 2020                | Around 230,000                            |
| Netherlands    | 17.26                | June, 1 <sup>st</sup>  | 56,000                 | Late-July                             | Around 1,800                                   | Around 2,800                                | End of 2020                | Around 170,000                            |
| Ireland        | 4.81                 | May, 31 <sup>st</sup>  | 20,000                 | Mid-July                              | Around 600                                     | Around 1,500                                | End of 2020                | Around 90,000                             |
| Denmark        | 5.73                 | May 31 <sup>st</sup>   | 20,000                 | Late-August                           | Around 600                                     | Around 1,000                                | End of 2020                | Around 60,000                             |

197 **5 Projections of countries without reported protest**

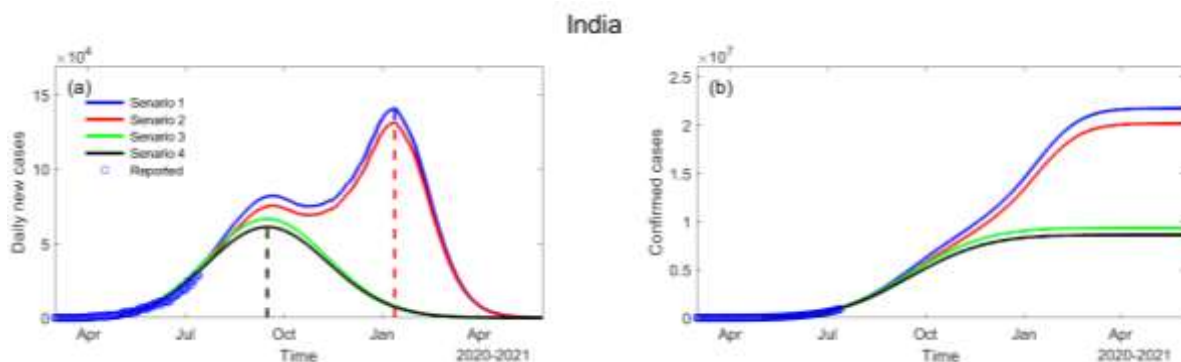

198

199 **Figure 4: Projections of the second outbreak in India in different scenarios.** Scenarios 1  
200 and 2 are simulated with seasonal forcing, while scenarios 3 and 4 are simulated without  
201 seasonal forcing. Scenarios 1 and 3 are the projections where restrictions are fully lifted, while  
202 scenarios 2 and 4 are the projections where restrictions are partially lifted.

203 Mass gathering events during the epidemic should be restricted or even banned since they  
204 have the potential to enhance the second outbreak and pose further radical public-health  
205 challenges for health authorities and governments<sup>23,24</sup>. Lifting the restrictions too early may  
206 also have the potential to trigger subsequent outbreaks and further increase the pressure on the  
207 medical system. Fig 4 shows the projections of India in the four scenarios. With seasonal  
208 forcing, it is predicted that the first peak of the epidemic will occur in September while the  
209 second peak with higher intensity, caused environmental changes, will arrive in January 2021.  
210 Without seasonal forcing, there would be only one peak in September 2020. We also projected  
211 the epidemic curve for other countries including Russia, Brazil, Chile, etc. that are still in the  
212 rapid growing period. We classified them as ‘non-protesting countries’, not because there are  
213 no protests. Indeed, there might have been many protests and mass gatherings in India, Brazil,  
214 and other regions that may impact the outbreak on varying degrees, but the information on the  
215 timing and size of these protests are currently not available. Therefore, the role of these protests  
216 on the timing and size of the outbreaks can not be isolated and may not be incorporated as a  
217 force into the model.

218 From Table 3 we can see that the peak time and size of the second outbreak varies from  
219 countries to countries, due to different levels of interventions measures, environmental

220 conditions, medical resources, etc. Regions with high population density are at higher risk of  
221 enhanced second outbreaks. When control measures are lifted too soon and environmental  
222 temperatures are more suitable for the spread of disease<sup>25</sup>, an enhanced second outbreak is  
223 expected. Therefore, when considering the timing of lifting the restrictions to restore the  
224 economy, it is necessary to analyze epidemic situations as well as climate factors. For example,  
225 during cold seasons when the transmission rate is higher, reopening would easily light up the  
226 second outbreaks, since conducive environmental factors and related human social behaviors  
227 (more frequent indoor gatherings) would, directly and indirectly, increase the transmission  
228 ability of the virus, leaving more people vulnerable to infection. Therefore, the peak of the  
229 second wave of the outbreak is most likely to synchronize with the fall of environmental  
230 temperature, displaying strong seasonality. During winter months, the temperate regions of the  
231 Northern and Southern Hemispheres experience highly synchronized annual influenza  
232 epidemics<sup>26</sup>. Additionally, when restrictions are lifted, personal protection (wearing face masks,  
233 keeping appropriate interpersonal distance, sterilization, etc)<sup>27</sup>. is still required or even  
234 mandatory in indoor places so as to minimize the infection rate by cutting off the infection  
235 routine.

**Table 3 Projections of the second outbreaks in some countries in Scenario 1 (without reported protests)**

| <b>Countries</b> | <b>Population<br/>(million)</b> | <b>The peak time of the second<br/>outbreaks</b> | <b>Peak time daily new incidence without<br/>protests</b> | <b>End of the second<br/>outbreak</b> | <b>Accumulated Confirmed<br/>Cases</b> |
|------------------|---------------------------------|--------------------------------------------------|-----------------------------------------------------------|---------------------------------------|----------------------------------------|
| India            | 1324                            | Early-November, 2020                             | Around 41,000                                             | February, 2021                        | Around 6,000,000                       |
| Russia           | 144.5                           | Late-September, 2020                             | Around 12,000                                             | April, 2021                           | Around 2,800,000                       |
| Brazil           | 209.5                           | Early-October, 2020                              | Around 60,000                                             | February, 2021                        | Around 11,200,000                      |
| Peru             | 32.05                           | Late-October, 2020                               | Around 13,000                                             | May, 2021                             | Around 2,500,000                       |
| Chile            | 18.60                           | Late-July, 2020                                  | Around 11,000                                             | April, 2021                           | Around 1,500,000                       |
| Argentina        | 44.49                           | January, 2021                                    | Around 5000                                               | April, 2021                           | Around 600,000                         |
| Pakistan         | 212.2                           | Early-August, 2020                               | Around 30,000                                             | November, 2020                        | Around 2,700,000                       |
| Saudi<br>Arabia  | 32.55                           | Late-July, 2020                                  | Around 13,000                                             | May, 2021                             | Around 3,500,000                       |
| Bangladesh       | 161.4                           | Late-August, 2020                                | Around 15,000                                             | January, 2021                         | Around 1,600,000                       |
| Qatar            | 2.64                            | Early-September, 2020                            | Around 2,400                                              | December, 2020                        | Around 240,000                         |
| Colombia         | 49.64                           | February, 2021                                   | Around 12,500                                             | May, 2021                             | Around 55,000                          |
| Belarus          | 9.51                            | Mid-August, 2020                                 | Around 2,800                                              | May, 2021                             | Around 2,800,000                       |
| Egypt            | 102.27                          | Mid-November, 2020                               | Around 2,800                                              | March, 2021                           | Around 420,000                         |
| Ecuador          | 17.08                           | Mid-August, 2020                                 | Around 5,000                                              | December, 2020                        | Around 300,000                         |

## 238 **6 Discussion and conclusion**

239 New treatments and vaccines are not yet available for any COVID-19-affected areas<sup>28</sup>. With  
240 the presence asymptomatic of carriers that may spread the virus, and the lack of herd immunity,  
241 a second outbreak is inevitable as confirmed cases of COVID-19 increase. Our results show  
242 that the timing and intensity of the second outbreaks are seasonally modulated and depend  
243 largely on local reopening policies. Higher seasonal variations in COVID-19 transmission may  
244 lead to a greater incidence of recurrent wintertime outbreaks<sup>29</sup>. The current mass protests in the  
245 United States and other regions of the world could lead to amplified second outbreaks,  
246 overlapping the wintertime outbreaks and threatening more lives. This is because the extremely  
247 crowded environments facilitate the spread of the virus, leading to high rates of the second  
248 attack, as seen in both the 1918 pandemic and the 1957 Asian influenza pandemic<sup>30-32</sup>.

249 If the transmission capacity of the second outbreak increases, it could place a catastrophic  
250 burden on the health system and create even more serious social and economic crises. However,  
251 if the chain of transmission is cut during the first outbreak, there will be no further outbreak  
252 similar to the first wave. The necessary drug therapies and vaccines currently require long-term  
253 development and testing, so nonpharmaceutical interventions are the only direct means  
254 available to suppress the spread of the disease<sup>33</sup>. In the face of a powerful pandemic, everyone  
255 must help to fight the virus. We must collectively follow the distancing limits recommended  
256 by global public-health organizations to effectively reduce the potential cost in the lives of the  
257 second wave of infection. Our findings should encourage close monitoring and early warning  
258 of the development of a global pandemic, as well as safeguards for our global prediction system  
259 to best contain the second wave<sup>34</sup>. These results provide a powerful scientific basis for  
260 governments to adjust their policies and control measures in real-time, to achieve the most  
261 effective allocation of medical resources before the second outbreak and to reduce the  
262 associated health risks.

263



264 **Acknowledgments:** The authors acknowledge the Center for Systems Science and  
265 Engineering (CSSE) at Johns Hopkins University for providing the COVID-19 data. We  
266 acknowledge E. Cheynet for providing the Generalized SEIR Epidemic Model (fitting and  
267 computation). This work was jointly supported by the National Science Foundation of China  
268 (41521004) and the Gansu Provincial Special Fund Project for Guiding Scientific and  
269 Technological Innovation and Development (Grant No. 2019ZX-06).

270

## 271 **References**

- 272 1. COVID-19 Data repository by the Center for Systems Science and Engineering  
273 (CSSE) at Johns Hopkins University 2020.  
274 <https://github.com/CSSEGISandData/COVID-19>.
- 275 2. Nicola, M. *et al.* The socio-economic implications of the coronavirus pandemic  
276 (COVID-19): a review. *Int. J. Surg.* **78**, 185–193 (2020).
- 277 3. World Health Organization (WHO). Coronavirus disease 2019 situation report 51 11th  
278 March 2020. *World Heal. Organ.* **2019**, 2633 (2020).
- 279 4. Petropoulos, F. & Makridakis, S. Forecasting the novel coronavirus COVID-19. *PLoS*  
280 *One* **15**, 1–8 (2020).
- 281 5. Linton, N. M. *et al.* Incubation period and other epidemiological characteristics of  
282 2019 novel coronavirus infections with right truncation: a statistical analysis of  
283 publicly available case data. *J. Clin. Med.* **9**, 538 (2020).
- 284 6. Tuli, S., Tuli, S., Tuli, R. & Gill, S. S. Predicting the growth and trend of COVID-19  
285 pandemic using machine learning and cloud computing. *Internet of Things* (2020)  
286 doi:10.1016/j.iot.2020.100222.
- 287 7. Wu, J. T., Leung, K. & Leung, G. M. Nowcasting and forecasting the potential  
288 domestic and international spread of the 2019-nCoV outbreak originating in Wuhan,

- 289 China: a modelling study. *Lancet* **395**, 689–697 (2020).
- 290 8. Wang, H. *et al.* Phase-adjusted estimation of the number of coronavirus disease 2019  
291 cases in Wuhan, China. *Cell Discov.* **6**, 10 (2020).
- 292 9. Yang, Z. *et al.* Modified SEIR and AI prediction of the epidemics trend of COVID-19  
293 in China under public health interventions. *J. Thorac. Dis.* (2020)  
294 doi:10.21037/jtd.2020.02.64.
- 295 10. Godio, A., Pace, F. & Vergnano, A. SEIR Modeling of the Italian Epidemic of SARS-  
296 CoV-2 Using Computational Swarm Intelligence. *Int. J. Environ. Res. Public Health*  
297 **17**, 3535 (2020).
- 298 11. Huang, J. *et al.* Global prediction system for COVID-19 pandemic. *Sci. Bull.* (2020).
- 299 12. Huang J. and Y. Yi., Inversion of nonlinear dynamical model from the observation.  
300 *Science in China (B)*. **34**, 1246-1251 (1991).
- 301 13. Huang J., Y. Yi, S. Wang, and J. Chou. 1993: An analogue-dynamical long-range  
302 numerical weather prediction system incorporating historical evolution. *Quarterly*  
303 *Journal of the Royal Meteorological Society*. **119**, 547-565 (1993). DOI:  
304 10.1002/qj.49711951111.
- 305 14. Peng, L., Yang, W., Zhang, D., Zhuge, C. & Hong, L. Epidemic analysis of COVID-  
306 19 in China by dynamical modeling. *medRxiv* 1–18 (2020)  
307 doi:<https://doi.org/10.1101/2020.02.16.20023465>.
- 308 15. Cheynet, E. Generalized SEIR epidemic model (fitting and computation). *GitHub*  
309 (2020).
- 310 16. Huang, Z. *et al.* Optimal temperature zone for the dispersal of COVID-19. *Sci. Total*  
311 *Environ.* **139487** (2020) doi:10.1016/j.scitotenv.2020.139487.
- 312 17. Madsen, K., Nielsen, H. B. & Tingleff, O. *Methods for non-linear least squares*  
313 *problems*. (2004). doi:10.1155/2012/312985.

- 314 18. Kőházi-Kis, A. Relative effectiveness of the trust-region algorithm with precise second  
315 order derivatives. **6**, 1–7 (2019).
- 316 19. Kim, C. Images of police using violence against peaceful protesters are going viral.  
317 [https://www.vox.com/2020/5/31/21275994/police-violence-peaceful-protesters-](https://www.vox.com/2020/5/31/21275994/police-violence-peaceful-protesters-images)  
318 [images.](https://www.vox.com/2020/5/31/21275994/police-violence-peaceful-protesters-images)
- 319 20. Rothenberg, C., Achanta, S., Svendsen, E. R. & Jordt, S. E. Tear gas: an  
320 epidemiological and mechanistic reassessment. *Ann. N. Y. Acad. Sci.* **1378**, 96–107  
321 (2016).
- 322 21. Parodi, S. M. & Liu, V. X. From containment to mitigation of COVID-19 in the US.  
323 *JAMA - J. Am. Med. Assoc.* **323**, 1441–1442 (2020).
- 324 22. Rocklöv, J. & Sjödin, H. High population densities catalyse the spread of COVID-19.  
325 *J. Travel Med.* **27**, 1–2 (2020).
- 326 23. McCloskey, B. *et al.* Mass gathering events and reducing further global spread of  
327 COVID-19: a political and public health dilemma. *The Lancet* vol. 395 1096–1099  
328 (2020).
- 329 24. Petersen, E. *et al.* Rapid spread of zika virus in the Americas - implications for public  
330 health preparedness for mass gatherings at the 2016 Brazil Olympic Games.  
331 *International Journal of Infectious Diseases* vol. 44 11–15 (2016).
- 332 25. Tosepu, R. *et al.* Correlation between weather and COVID-19 pandemic in Jakarta,  
333 Indonesia. *Sci. Total Environ.* **725**, (2020).
- 334 26. Tamerius, J. D. *et al.* Environmental predictors of seasonal influenza epidemics across  
335 temperate and tropical climates. *PLoS Pathog.* (2013)  
336 doi:10.1371/journal.ppat.1003194.
- 337 27. World Health Organization(WHO). Coronavirus disease (COVID-19) advice for the  
338 public. [https://www.who.int/emergencies/diseases/novel-coronavirus-2019/advice-for-](https://www.who.int/emergencies/diseases/novel-coronavirus-2019/advice-for-public)

- 339 public.
- 340 28. Bai, Z. *et al.* The rapid assessment and early warning models for COVID-19.  
341 *Virologica Sinica* (2020) doi:10.1007/s12250-020-00219-0.
- 342 29. Kissler, S. M., Tedijanto, C., Goldstein, E., Grad, Y. H. & Lipsitch, M. Projecting the  
343 transmission dynamics of SARS-CoV-2 through the postpandemic period. *Science*  
344 (2020) doi:10.1126/science.abb5793.
- 345 30. Rainey, J. J., Phelps, T. & Shi, J. Mass gatherings and respiratory disease outbreaks in  
346 the United States – should we be worried? results from a systematic literature review  
347 and analysis of the national outbreak reporting system. *PLoS One* **11**, e0160378  
348 (2016).
- 349 31. Tomes, N. ‘Destroyer and teacher’: managing the masses during the 1918-1919  
350 influenza pandemic. *Public Health Reports* vol. 125 48–62 (2010).
- 351 32. Alexander Langmuir, M. D. Asian influenza in the United States. *Ann. Intern. Med.*  
352 **49**, 483 (1958).
- 353 33. Prem, K. *et al.* The effect of control strategies to reduce social mixing on outcomes of  
354 the COVID-19 epidemic in Wuhan, China: a modelling study. *Lancet Public Heal.* **5**,  
355 e261–e270 (2020).
- 356 34. Shea, K. *et al.* Harnessing multiple models for outbreak management. *Science* (2020)  
357 doi:10.1126/science.abb9934.
